# Supplementary material
Source: publisher figshare collection journal article supplement (https://microbiology.figshare.com/ndownloader/files/16376141)
Supplement: Supplementary file 1 [file 16376141]

## Sheet: CRISPR  elements
CRISPR REGIONS
		Confirmed and Questionable CRISPRs	Direct repeat	Spacer	Direct repeat length	Number of spacers	CRISPR length
	E . ictaluri LADL11-100
		1-Questionable CRISPR	GAACTGCACCCAAAAAGTGACAACGTCGCTATCGC	GTCATCCCCGCGGCCGCGGGAGAACAG	35	1	96
			GAACTGCACCCCAAAAGTGACAACGTCGCTATCGC
	E . ictaluri LADL11-194
		1-Questionable CRISPR	ACCGACCCCCACCATGTCAAGGTGGTGCTCTAACCAACTGAGCTACGGACGCA	CTGGTGCATACTGTGAAATGGTGCGTCCGAGTAGACTCGAACT	53	1	148
			ACCGACCCCCACCATGTCAAGGTGGTGCTCTAACCAACTGAGCTACGGACGCA
		2-Questionable CRISPR	GAACTGCACCCAAAAAGTGACAACGTCGCTATCGC	GTCATCCCCGCGGCCGCGGGAGAACAG	35	1	96
			GAACTGCACCCCAAAAGTGACAACGTCGCTATCGC
	E .ictaluri 93-146	NO CRISPR region
	E .ictaluri RUSVM-1	NO CRISPR region
	E .ictaluri ATCC33202	NO CRISPR region
	E . piscicida ACC35.1	1-Confirmed CRISPRs	TAAACACCCCCACAGGCGTGGGGAAGAC	CAAGCGCGTAACCGTCGAGATTTTTGGCGATGTA	28	8	517
			GAAACACCCCCACAGACGTGGGGAAGAC	GTACTGTAGAAGATATACCCCAGGTGGGCGCCG
			GAAACACCCCCACACACGTGGGGAAGAC	CTGGACATGGTGATAGCATCACTACTGATTAGG
			GAAACACCCCCACAGGCGTGGGGAAAAC	GATGCCAGGTTGGTGAACATCTTCTTCACGTCG
			GAAACACCCCCACAGGCGTGGGGAAAAC	TTACCCACAACAAAATATTACCAGCCTCTAGTA
			GAAACACCCCCACAGGCGTGGGGAAAAC	CAAAGTCAGGACGCCAACCTAATTTCCATGCTG
			GAAACACCCCCACAGGCGTGGGGAAAAC	ATCATTTCTATTTCTGAGGCTCTTATAAAGTCA
			GAAACACCCCCACAGGCGTGGGGAAAAC	CGCCTGAGCTATGAGCAAATCGTAGCGGCGCAAA
			GAAACACCCCCACAGGCGTGGGGAAGAC
		2-Confirmed CRISPRs	TCCACACCCCCACGGACGTGGGGAAGAC	TATCCGGCATCTGCTCCAGTACCTCATCCTCAA	28	16	1004
			GAAACACCCCCACGGACGTGGGGAAGAC	CGGACAACTACCGCAACGGTGAGTGGCATATCG
			GAAACACCCCCACGGACGTGGGGAAGAC	GCCAAGGCGACATCGACATAGAAACCGCGGTCA
			GAAACACCCCCACGGACGTGGGGAAGAC	GGCTCCATCAGGTTTTGGTCACGGAACCACTCA
			GAAACACCCCCACGGACGTGGGGAAGAC	GCACCCTGATTTTTCGGCCTTACCGACAGTATG
			GAAACACCCCCACGGACGTGGGGAAGAC	CCAAAAAAGGCACCGGCGCCATACAGATCCCGA
			GAAACACCCCCACGGACGTGGGGAAGAC	CAGCCCGGAGAAGCTGACCGGCGGCTCGTACCA
			GAAACACCCCCACGGACGTGGGGAAGAC	GCTTTATCGTCGACAAACTCGCACATAAACAGG
			GAAACACCCCCACGGACGTGGGGAAGAC	TCGGCGCACCCGACCAACTCGGAGGGCGTCAGA
			GAAACACCCCCACGGACGTGGGGAAGAC	TGCCAACCCCTGATCCTGCGCAGACGCAGCTCA
			GAAACACCCCCACGGACGTGGGGAAGAC	AAAATTACCTCGCCGCCGGCATAGGTGAGATCG
			GAAACACCCCCACGGACGTGGGGAAGAC	GTCGCGCTTTACTGCTTCACTTGCGATAACGAA
			GAAACACCCCCACGGACGTGGGGAAGAC	ACAACTACTTTCTGCATGAAGCACTGCGCGTTA
			GAAACACCCCCACGGACGTGGGGAAGAC	CCCTGCTCTAGCTCGCGCTGGACGCTAAAGTAG
			GAAACACCCCCACGGACGTGGGGAAGAC	TCAACAGGTACGCCTGCCTTGATACCGTCAGCGA
			GAAACACCCCCACGGACGTGGGGAAGAC	TCTTCCATATGCTGCGCTGCGGCCGATAGGATA
			GAAACACCCCCACGGACGTGGGGAAGAC
		3-Questionable CRISPR	TATCACCGGGATAATCCGCTGCATCTGGATGTGCTGGT		38	0	100
			TATCACCGGGATAATCCGCTGCATCTGGATGTGCTGGT
		4-Questionable CRISPR	GCGCTGGGCGGCTCACCGCCGTCGG	CGGGGTGGGGTTATCTTCTCCGTCTTGCTATCCGCACCGCCGGCTGCGCCGTCGCGTGGG	25	1	109
			GCGCTGGGCGGCTCCCCGCCGTCGG
		5-Questionable CRISPR	TAGTGCCCCCTGCAATGAAAAAGCCCACTGAAA	GGAGGTATCCACATCGCCCCCGCAAGGGTGAACTCGGGTGGGACGCT	33	1	112
			AGTGCCCCCCTGCAATGAAAAAGCCCACTGAAA
		6-Questionable CRISPR	TTTTGCTTACCTGAACCAATCCCGGAAT	GCTTCCAGCATATGACCCGTGTTGTGAGTAGAACTTTTTCA	28	1	96
			TTTTGCTTACTTGAACCAATCCCGGAAT
	E. piscicida C07-87	1-Questionable CRISPR	CTTGCTATCTGCATCGCCGGCTGCGCCG	CCGCGCTGGGCGGCTCACCGCCGTCGGCGGGGTGGGGTTATCTTCTCCGT	28	1	105
			CTTGCTATCCGCATCGCCGGCTGCGCCG
		2-Questionable CRISPR	GATGGCGATGCCGATGGGCGGGCCA	CGGGAAAAAACCGATGGCGATGCCGATGGCGGGCCACGGGGAAAAACCGACGGC	25	1	103
			GATGGCGATGCCGATGGCGGGCCAT
	E. piscicida EIB202	1-Questionable CRISPR	CTTGCTATCTGCATCGCCGGCTGCGCCG	CCGCGCTGGGCGGCTCACCGCCGTCGGCGGGGTGGGGTTATCTTCTCCGT	28	1	105
			CTTGCTATCCGCATCGCCGGCTGCGCCG
	E. piscicida ET883	1-Questionable CRISPR	CTTGCTATCTGCATCGCCGGCTGCGCCG	CCGCGCTGGGCGGCTCACCGCCGTCGGCGGGGTGGGGTTATCTTCTCCGT	28	1	105
			CTTGCTATCCGCATCGCCGGCTGCGCCG
	E. piscicida ETW41	1-Questionable CRISPR	CGGCGCAGCCGGCGATGCGGATAGCAAG	ACGGAGAAGATAACCCCACCCCGCCGACGGCGGTGAGCCGCCCAGCGCGG	28	1	105
			CGGCGCAGCCGGCGATGCAGATAGCAAG
	E. piscicida FL6-60	1-Questionable CRISPR	CTTGCTATCTGCATCGCCGGCTGCGCCG	CCGCGCTGGGCGGCTCACCGCCGTCGGCGGGGTGGGGTTATCTTCTCCGT	28	1	105
			CTTGCTATCCGCATCGCCGGCTGCGCCG
	E. piscicida JF1305	1-Questionable CRISPR	CTTGCTATCTGCATCGCCGGCTGCGCCG	CCGCGCTGGGCGGCTCACCGCCGTCGGCGGGGTGGGGTTATCTTCTCCGT	28	1	105
			CTTGCTATCCGCATCGCCGGCTGCGCCG
	E. piscicida S11-285	1-Confirmed CRISPRs	AGAAACACCCCCACAGGCGTGGGGAAGAC	ATATCAGCTACCAGATAGGCGGGATAATCCGT	29	8	516
			AGAAACACCCCCACAGGCGTGGGGAAGAC	GCCTAACGGCTGCTCTCGATGGTAGCTCCCTC
			GGAAACACCCCCACAGGCGTGGGGAAGAC	AGTACAATAGACAAGCCGCCAGACCATGCCGG
			GGAAACACCCCCACAGGCGTGGGGAAGAC	TGACGACCGTTGACGTCGATTACCGTGTTGTT
			AGAAACACCCCCACAGGCGTGGGGAAAAC	AGCCACCGGCCAGGGCATCCTCGATGGTGACG
			AGAAACACCCCCACAGGCGTGGGGAAAAC	CAGCTTGCATCTTAGCAATGGCTTCGGTCAGC
			AGAAACACCCCCACAGGCGTGGGGAAAAC	GGCAGCGTTTTGATGTAATCGAGAGAATCAGC
			GGAAACACCCCCACAGGCGTGGGGAAAAC	GCCGCGATCGTAACGCCGTTGCAACTTCTCAC
			GGAAACACCCCCACAGGCGTGGGGAAAAC
		2-Confirmed CRISPRs	TCCACACCCCCACGGACGTGGGGAAGAC	GTCGAAGATAACAACCGAGACCACGGGAAAGAG	28	7	454
			GAAACACCCCCACGGACGTGGGGAAGAC	GTGATAAGCAACTTCCCAGGAATGACTGAGGAA
			GAAACACCCCCACGGACGTGGGGAAGAC	CAATTCGTCGGGCCACCACGATCGGCGGGATGG
			GAAACACCCCCACGGACGTGGGGAAGAC	TCCAAGGGCTAAGGCCATCTCTGTCTGCCAGCG
			GAAACACCCCCACGGACGTGGGGAAGAC	GAGTTCTTTTTGAAGTCGCCAGGAATAATGAAG
			GAAACACCCCCACGGACGTGGGGAAGAC	CCACTGGAGTGAGCTGAAAGCGGCCATCATGGA
			GAAACACCCCCACGGACGTGGGGAAGAC	AGGCCATCAACAAAGTAAAAGAGCCATCTAGGG
			GAAACACCCCCACGGACGTGGGGAAGAC
		3-Questionable CRISPR	ATGCCCCCACCCCGCGCAGGCGCGCCCA	TCGGCCTGCCCGTTATTCCCCAGCCAGCGACACGCTTCAGCCGGG	28	1	100
			ATGCCCCCACCCCGCGCAGGCGCGGCCC

## Sheet: Cas genes
CAS GENES
	Cas-TypeI	Cas-TypeIII
	Mandatory	Mandatory
E . ictaluri LADL11-100	cas3_TypeI(3)	csm2_TypeIIIA(1)
E . ictaluri LADL11-194	cas3_TypeI(3)	csm2_TypeIIIA(1)
E .ictaluri 93-146	cas3_TypeI(5)	csm2_TypeIIIA(1)
E .ictaluri RUSVM-1	cas3_TypeI(5)	csm2_TypeIIIA(1)
E .ictaluri ATCC33202	cas3_TypeI(5)	csm2_TypeIIIA(1)
E . piscicida ACC35.1	cas1_TypeIE	csm2_TypeIIIA(1)
	cse2_TypeIE
	cas5_TypeIE
	cas3_TypeI(6)
	cas6_TypeIE
	cse1_TypeIE
	cas2_TypeIE
	cas7_TypeIE
E. piscicida C07-87	cas3_TypeI(6)	csm2_TypeIIIA(1)
E. piscicida EIB202	cas3_TypeI(5)	csm2_TypeIIIA(1)
E. piscicida ET883	cas3_TypeI(5)	csm2_TypeIIIA(1)
E. piscicida ETW41	cas3_TypeI(5)	csm2_TypeIIIA(1)
E. piscicida FL6-60	cas3_TypeI(5)	csm2_TypeIIIA(1)
E. piscicida JF1305	cas3_TypeI(5)	csm2_TypeIIIA(1)
E. piscicida S11-285	cas1_TypeIE	csm2_TypeIIIA(1)
	cse2_TypeIE
	cas5_TypeIE
	cas3_TypeI(6)
	cas6_TypeIE
	cse1_TypeIE
	cas2_TypeIE
	cas7_TypeIE
	#Hit_Id	Gene	Predicted_system	System_Id	Gene_status	i-evalue	Score	Profile_coverage	Sequence_coverage	Begin_match	End_match
E . ictaluri LADL11-100	WP_015872197.1	csm2_TypeIIIA	CAS-TypeIII	CAS-TypeIII_putative	mandatory	6.9e-05	21	0.864583	0.743119	7	87
	WP_049640048.1	cas3_TypeI	CAS-TypeIII	CAS-TypeIII_putative	forbidden	0.00013	18.5	0.553073	0.302508	152	344
	WP_049640264.1	cas3_TypeI	CAS-TypeIII	CAS-TypeIII_putative	forbidden	2.1e-10	37.5	0.893855	0.671875	47	347
	WP_049640477.1	cas3_TypeI	CAS-TypeIII	CAS-TypeIII_putative	forbidden	3.4e-15	53.3	0.569832	0.435449	136	334
	WP_049640048.1	cas3_TypeI	CAS-TypeI	CAS-TypeI_putative	mandatory	0.00013	18.5	0.553073	0.302508	152	344
	WP_049640264.1	cas3_TypeI	CAS-TypeI	CAS-TypeI_putative	mandatory	2.1e-10	37.5	0.893855	0.671875	47	347
	WP_049640477.1	cas3_TypeI	CAS-TypeI	CAS-TypeI_putative	mandatory	3.4e-15	53.3	0.569832	0.435449	136	334
E . ictaluri LADL11-194	WP_015872197.1	csm2_TypeIIIA	CAS-TypeIII	CAS-TypeIII_putative	mandatory	6.7e-05	21	0.864583	0.743119	7	87
	WP_049640048.1	cas3_TypeI	CAS-TypeIII	CAS-TypeIII_putative	forbidden	0.00012	18.5	0.553073	0.302508	152	344
	WP_049640264.1	cas3_TypeI	CAS-TypeIII	CAS-TypeIII_putative	forbidden	2.1e-10	37.5	0.893855	0.671875	47	347
	WP_049640477.1	cas3_TypeI	CAS-TypeIII	CAS-TypeIII_putative	forbidden	3.3e-15	53.3	0.569832	0.435449	136	334
	WP_049640048.1	cas3_TypeI	CAS-TypeI	CAS-TypeI_putative	mandatory	0.00012	18.5	0.553073	0.302508	152	344
	WP_049640264.1	cas3_TypeI	CAS-TypeI	CAS-TypeI_putative	mandatory	2.1e-10	37.5	0.893855	0.671875	47	347
	WP_049640477.1	cas3_TypeI	CAS-TypeI	CAS-TypeI_putative	mandatory	3.3e-15	53.3	0.569832	0.435449	136	334
E .ictaluri 93-146	WP_015872197.1	csm2_TypeIIIA	CAS-TypeIII	CAS-TypeIII_putative	mandatory	8.1e-05	21	0.864583	0.743119	7	87
	WP_015869514.1	cas3_TypeI	CAS-TypeIII	CAS-TypeIII_putative	forbidden	1.1e-09	35.4	0.541899	0.284271	391	587
	WP_015869910.1	cas3_TypeI	CAS-TypeIII	CAS-TypeIII_putative	forbidden	0.00015	18.5	0.553073	0.304416	152	344
	WP_015870842.1	cas3_TypeI	CAS-TypeIII	CAS-TypeIII_putative	forbidden	4.2e-15	53.2	0.567039	0.43326	137	334
	WP_015871622.1	cas3_TypeI	CAS-TypeIII	CAS-TypeIII_putative	forbidden	2e-08	31.2	0.536313	0.157849	733	914
	WP_015872283.1	cas3_TypeI	CAS-TypeIII	CAS-TypeIII_putative	forbidden	2.7e-10	37.3	0.893855	0.671875	47	347
	WP_015869514.1	cas3_TypeI	CAS-TypeI	CAS-TypeI_putative	mandatory	1.1e-09	35.4	0.541899	0.284271	391	587
	WP_015869910.1	cas3_TypeI	CAS-TypeI	CAS-TypeI_putative	mandatory	0.00015	18.5	0.553073	0.304416	152	344
	WP_015870842.1	cas3_TypeI	CAS-TypeI	CAS-TypeI_putative	mandatory	4.2e-15	53.2	0.567039	0.43326	137	334
	WP_015871622.1	cas3_TypeI	CAS-TypeI	CAS-TypeI_putative	mandatory	2e-08	31.2	0.536313	0.157849	733	914
	WP_015872283.1	cas3_TypeI	CAS-TypeI	CAS-TypeI_putative	mandatory	2.7e-10	37.3	0.893855	0.671875	47	347
E .ictaluri RUSVM-1	WP_015872197.1	csm2_TypeIIIA	CAS-TypeIII	CAS-TypeIII_putative	mandatory	7.5e-05	21	0.864583	0.743119	7	87
	WP_015869910.1	cas3_TypeI	CAS-TypeIII	CAS-TypeIII_putative	forbidden	0.00013	18.5	0.553073	0.304416	152	344
	WP_015870842.1	cas3_TypeI	CAS-TypeIII	CAS-TypeIII_putative	forbidden	3.9e-15	53.2	0.567039	0.43326	137	334
	WP_049640264.1	cas3_TypeI	CAS-TypeIII	CAS-TypeIII_putative	forbidden	2.3e-10	37.5	0.893855	0.671875	47	347
	WP_081165585.1	cas3_TypeI	CAS-TypeIII	CAS-TypeIII_putative	forbidden	1.4e-08	31.7	0.541899	0.159584	731	914
	WP_081167138.1	cas3_TypeI	CAS-TypeIII	CAS-TypeIII_putative	forbidden	1e-09	35.4	0.541899	0.284271	391	587
	WP_015869910.1	cas3_TypeI	CAS-TypeI	CAS-TypeI_putative	mandatory	0.00013	18.5	0.553073	0.304416	152	344
	WP_015870842.1	cas3_TypeI	CAS-TypeI	CAS-TypeI_putative	mandatory	3.9e-15	53.2	0.567039	0.43326	137	334
	WP_049640264.1	cas3_TypeI	CAS-TypeI	CAS-TypeI_putative	mandatory	2.3e-10	37.5	0.893855	0.671875	47	347
	WP_081165585.1	cas3_TypeI	CAS-TypeI	CAS-TypeI_putative	mandatory	1.4e-08	31.7	0.541899	0.159584	731	914
	WP_081167138.1	cas3_TypeI	CAS-TypeI	CAS-TypeI_putative	mandatory	1e-09	35.4	0.541899	0.284271	391	587
E .ictaluri ATCC33202	WP_015872197.1	csm2_TypeIIIA	CAS-TypeIII	CAS-TypeIII_putative	mandatory	8.1e-05	21	0.864583	0.743119	7	87
	WP_015869514.1	cas3_TypeI	CAS-TypeIII	CAS-TypeIII_putative	forbidden	1.1e-09	35.4	0.541899	0.284271	391	587
	WP_015869910.1	cas3_TypeI	CAS-TypeIII	CAS-TypeIII_putative	forbidden	0.00014	18.5	0.553073	0.304416	152	344
	WP_015870842.1	cas3_TypeI	CAS-TypeIII	CAS-TypeIII_putative	forbidden	4.2e-15	53.2	0.567039	0.43326	137	334
	WP_015871622.1	cas3_TypeI	CAS-TypeIII	CAS-TypeIII_putative	forbidden	1.9e-08	31.2	0.536313	0.157849	733	914
	WP_015872283.1	cas3_TypeI	CAS-TypeIII	CAS-TypeIII_putative	forbidden	2.7e-10	37.3	0.893855	0.671875	47	347
	WP_015869514.1	cas3_TypeI	CAS-TypeI	CAS-TypeI_putative	mandatory	1.1e-09	35.4	0.541899	0.284271	391	587
	WP_015869910.1	cas3_TypeI	CAS-TypeI	CAS-TypeI_putative	mandatory	0.00014	18.5	0.553073	0.304416	152	344
	WP_015870842.1	cas3_TypeI	CAS-TypeI	CAS-TypeI_putative	mandatory	4.2e-15	53.2	0.567039	0.43326	137	334
	WP_015871622.1	cas3_TypeI	CAS-TypeI	CAS-TypeI_putative	mandatory	1.9e-08	31.2	0.536313	0.157849	733	914
	WP_015872283.1	cas3_TypeI	CAS-TypeI	CAS-TypeI_putative	mandatory	2.7e-10	37.3	0.893855	0.671875	47	347
E . piscicida ACC35.1	WP_015462114.1	csm2_TypeIIIA	CAS-TypeIII	CAS-TypeIII_putative	mandatory	4.3e-05	21.9	0.864583	0.743119	7	87
	WP_012846910.1	cas3_TypeI	CAS-TypeIII	CAS-TypeIII_putative	forbidden	8.4e-10	35.8	0.541899	0.284271	391	587
	WP_015461320.1	cas3_TypeI	CAS-TypeIII	CAS-TypeIII_putative	forbidden	3.6e-13	46.9	0.575419	0.439825	137	337
	WP_015462175.1	cas3_TypeI	CAS-TypeIII	CAS-TypeIII_putative	forbidden	7.5e-10	36	0.893855	0.671875	47	347
	WP_069578773.1	cas3_TypeI	CAS-TypeIII	CAS-TypeIII_putative	forbidden	1.6e-08	31.6	0.539106	0.158716	732	914
	WP_073381514.1	cas3_TypeI	CAS-TypeIII	CAS-TypeIII_putative	forbidden	0.00011	19	0.824022	0.423197	75	344
	WP_073383333.1	cas3_TypeI	CAS-TypeIII	CAS-TypeIII_putative	forbidden	7.6e-58	193.9	0.902235	0.393871	276	622
	WP_012846910.1	cas3_TypeI	CAS-TypeI	CAS-TypeI_putative	mandatory	8.4e-10	35.8	0.541899	0.284271	391	587
	WP_015461320.1	cas3_TypeI	CAS-TypeI	CAS-TypeI_putative	mandatory	3.6e-13	46.9	0.575419	0.439825	137	337
	WP_015462175.1	cas3_TypeI	CAS-TypeI	CAS-TypeI_putative	mandatory	7.5e-10	36	0.893855	0.671875	47	347
	WP_069578773.1	cas3_TypeI	CAS-TypeI	CAS-TypeI_putative	mandatory	1.6e-08	31.6	0.539106	0.158716	732	914
	WP_069579040.1	cas7_TypeIE	CAS-TypeI	CAS-TypeI_putative	mandatory	8.7e-101	335.6	0.990769	0.878963	8	312
	WP_069579041.1	cas6_TypeIE	CAS-TypeI	CAS-TypeI_putative	mandatory	1.5e-45	153.6	0.995192	0.957346	3	204
	WP_069579044.1	cse2_TypeIE	CAS-TypeI	CAS-TypeI_putative	mandatory	6.8e-27	92.3	0.974843	0.856322	18	166
	WP_071890331.1	cas2_TypeIE	CAS-TypeI	CAS-TypeI_putative	mandatory	5e-28	94.7	1	0.915789	1	87
	WP_073381514.1	cas3_TypeI	CAS-TypeI	CAS-TypeI_putative	mandatory	0.00011	19	0.824022	0.423197	75	344
	WP_073383323.1	cas1_TypeIE	CAS-TypeI	CAS-TypeI_putative	mandatory	1e-97	324.1	0.992565	0.917808	14	281
	WP_073383325.1	cas5_TypeIE	CAS-TypeI	CAS-TypeI_putative	mandatory	1.1e-54	183.1	0.991304	0.966245	5	233
	WP_073383328.1	cse1_TypeIE	CAS-TypeI	CAS-TypeI_putative	mandatory	8.8e-62	207.1	0.968254	0.965587	6	482
	WP_073383333.1	cas3_TypeI	CAS-TypeI	CAS-TypeI_putative	mandatory	7.6e-58	193.9	0.902235	0.393871	276	622
E. piscicida C07-87	WP_015462114.1	csm2_TypeIIIA	CAS-TypeIII	CAS-TypeIII_putative	mandatory	4.3e-05	21.9	0.864583	0.743119	7	87
	WP_012846910.1	cas3_TypeI	CAS-TypeIII	CAS-TypeIII_putative	forbidden	8.6e-10	35.8	0.541899	0.284271	391	587
	WP_012847284.1	cas3_TypeI	CAS-TypeIII	CAS-TypeIII_putative	forbidden	0.00027	17.7	0.550279	0.302839	153	344
	WP_015461320.1	cas3_TypeI	CAS-TypeIII	CAS-TypeIII_putative	forbidden	3.7e-13	46.9	0.575419	0.439825	137	337
	WP_015461759.1	cas3_TypeI	CAS-TypeIII	CAS-TypeIII_putative	forbidden	1.6e-08	31.6	0.539106	0.158716	732	914
	WP_015462030.1	cas3_TypeI	CAS-TypeIII	CAS-TypeIII_putative	forbidden	2.7e-58	195.3	0.902235	0.393871	276	622
	WP_015462175.1	cas3_TypeI	CAS-TypeIII	CAS-TypeIII_putative	forbidden	7.6e-10	36	0.893855	0.671875	47	347
	WP_012846910.1	cas3_TypeI	CAS-TypeI	CAS-TypeI_putative	mandatory	8.6e-10	35.8	0.541899	0.284271	391	587
	WP_012847284.1	cas3_TypeI	CAS-TypeI	CAS-TypeI_putative	mandatory	0.00027	17.7	0.550279	0.302839	153	344
	WP_015461320.1	cas3_TypeI	CAS-TypeI	CAS-TypeI_putative	mandatory	3.7e-13	46.9	0.575419	0.439825	137	337
	WP_015461759.1	cas3_TypeI	CAS-TypeI	CAS-TypeI_putative	mandatory	1.6e-08	31.6	0.539106	0.158716	732	914
	WP_015462030.1	cas3_TypeI	CAS-TypeI	CAS-TypeI_putative	mandatory	2.7e-58	195.3	0.902235	0.393871	276	622
	WP_015462175.1	cas3_TypeI	CAS-TypeI	CAS-TypeI_putative	mandatory	7.6e-10	36	0.893855	0.671875	47	347
E. piscicida EIB202	WP_015462114.1	csm2_TypeIIIA	CAS-TypeIII	CAS-TypeIII_putative	mandatory	4.2e-05	21.9	0.864583	0.743119	7	87
	WP_012846910.1	cas3_TypeI	CAS-TypeIII	CAS-TypeIII_putative	forbidden	8.3e-10	35.8	0.541899	0.284271	391	587
	WP_012847284.1	cas3_TypeI	CAS-TypeIII	CAS-TypeIII_putative	forbidden	0.00026	17.7	0.550279	0.302839	153	344
	WP_012848226.1	cas3_TypeI	CAS-TypeIII	CAS-TypeIII_putative	forbidden	3.7e-13	46.8	0.575419	0.439825	137	337
	WP_012849558.1	cas3_TypeI	CAS-TypeIII	CAS-TypeIII_putative	forbidden	7.4e-10	36	0.893855	0.671875	47	347
	WP_034167956.1	cas3_TypeI	CAS-TypeIII	CAS-TypeIII_putative	forbidden	1.5e-08	31.6	0.539106	0.158716	732	914
	WP_012846910.1	cas3_TypeI	CAS-TypeI	CAS-TypeI_putative	mandatory	8.3e-10	35.8	0.541899	0.284271	391	587
	WP_012847284.1	cas3_TypeI	CAS-TypeI	CAS-TypeI_putative	mandatory	0.00026	17.7	0.550279	0.302839	153	344
	WP_012848226.1	cas3_TypeI	CAS-TypeI	CAS-TypeI_putative	mandatory	3.7e-13	46.8	0.575419	0.439825	137	337
	WP_012849558.1	cas3_TypeI	CAS-TypeI	CAS-TypeI_putative	mandatory	7.4e-10	36	0.893855	0.671875	47	347
	WP_034167956.1	cas3_TypeI	CAS-TypeI	CAS-TypeI_putative	mandatory	1.5e-08	31.6	0.539106	0.158716	732	914
E. piscicida ET883	WP_015462114.1	csm2_TypeIIIA	CAS-TypeIII	CAS-TypeIII_putative	mandatory	4.4e-05	21.9	0.864583	0.743119	7	87
	WP_012849558.1	cas3_TypeI	CAS-TypeIII	CAS-TypeIII_putative	forbidden	7.7e-10	36	0.893855	0.671875	47	347
	WP_034167956.1	cas3_TypeI	CAS-TypeIII	CAS-TypeIII_putative	forbidden	1.6e-08	31.6	0.539106	0.158716	732	914
	WP_034168264.1	cas3_TypeI	CAS-TypeIII	CAS-TypeIII_putative	forbidden	0.00027	17.7	0.550279	0.304762	153	344
	WP_034168377.1	cas3_TypeI	CAS-TypeIII	CAS-TypeIII_putative	forbidden	6.4e-13	46.1	0.575419	0.439825	137	337
	WP_034168576.1	cas3_TypeI	CAS-TypeIII	CAS-TypeIII_putative	forbidden	8.6e-10	35.8	0.541899	0.284271	391	587
	WP_012849558.1	cas3_TypeI	CAS-TypeI	CAS-TypeI_putative	mandatory	7.7e-10	36	0.893855	0.671875	47	347
	WP_034167956.1	cas3_TypeI	CAS-TypeI	CAS-TypeI_putative	mandatory	1.6e-08	31.6	0.539106	0.158716	732	914
	WP_034168264.1	cas3_TypeI	CAS-TypeI	CAS-TypeI_putative	mandatory	0.00027	17.7	0.550279	0.304762	153	344
	WP_034168377.1	cas3_TypeI	CAS-TypeI	CAS-TypeI_putative	mandatory	6.4e-13	46.1	0.575419	0.439825	137	337
	WP_034168576.1	cas3_TypeI	CAS-TypeI	CAS-TypeI_putative	mandatory	8.6e-10	35.8	0.541899	0.284271	391	587
E. piscicida ETW41	WP_015462114.1	csm2_TypeIIIA	CAS-TypeIII	CAS-TypeIII_putative	mandatory	4.4e-05	21.9	0.864583	0.743119	7	87
	WP_012846910.1	cas3_TypeI	CAS-TypeIII	CAS-TypeIII_putative	forbidden	8.7e-10	35.8	0.541899	0.284271	391	587
	WP_012847284.1	cas3_TypeI	CAS-TypeIII	CAS-TypeIII_putative	forbidden	0.00028	17.7	0.550279	0.302839	153	344
	WP_012848226.1	cas3_TypeI	CAS-TypeIII	CAS-TypeIII_putative	forbidden	3.8e-13	46.8	0.575419	0.439825	137	337
	WP_012849558.1	cas3_TypeI	CAS-TypeIII	CAS-TypeIII_putative	forbidden	7.8e-10	36	0.893855	0.671875	47	347
	WP_080783682.1	cas3_TypeI	CAS-TypeIII	CAS-TypeIII_putative	forbidden	1.6e-08	31.6	0.539106	0.158716	732	914
	WP_012846910.1	cas3_TypeI	CAS-TypeI	CAS-TypeI_putative	mandatory	8.7e-10	35.8	0.541899	0.284271	391	587
	WP_012847284.1	cas3_TypeI	CAS-TypeI	CAS-TypeI_putative	mandatory	0.00028	17.7	0.550279	0.302839	153	344
	WP_012848226.1	cas3_TypeI	CAS-TypeI	CAS-TypeI_putative	mandatory	3.8e-13	46.8	0.575419	0.439825	137	337
	WP_012849558.1	cas3_TypeI	CAS-TypeI	CAS-TypeI_putative	mandatory	7.8e-10	36	0.893855	0.671875	47	347
	WP_080783682.1	cas3_TypeI	CAS-TypeI	CAS-TypeI_putative	mandatory	1.6e-08	31.6	0.539106	0.158716	732	914
E. piscicida FL6-60	WP_015462114.1	csm2_TypeIIIA	CAS-TypeIII	CAS-TypeIII_putative	mandatory	4.1e-05	21.9	0.864583	0.743119	7	87
	WP_012846910.1	cas3_TypeI	CAS-TypeIII	CAS-TypeIII_putative	forbidden	8.1e-10	35.8	0.541899	0.284271	391	587
	WP_012848226.1	cas3_TypeI	CAS-TypeIII	CAS-TypeIII_putative	forbidden	3.6e-13	46.8	0.575419	0.439825	137	337
	WP_012849558.1	cas3_TypeI	CAS-TypeIII	CAS-TypeIII_putative	forbidden	7.3e-10	36	0.893855	0.671875	47	347
	WP_015683222.1	cas3_TypeI	CAS-TypeIII	CAS-TypeIII_putative	forbidden	0.00025	17.8	0.550279	0.309179	153	344
	WP_034167956.1	cas3_TypeI	CAS-TypeIII	CAS-TypeIII_putative	forbidden	1.5e-08	31.6	0.539106	0.158716	732	914
	WP_012846910.1	cas3_TypeI	CAS-TypeI	CAS-TypeI_putative	mandatory	8.1e-10	35.8	0.541899	0.284271	391	587
	WP_012848226.1	cas3_TypeI	CAS-TypeI	CAS-TypeI_putative	mandatory	3.6e-13	46.8	0.575419	0.439825	137	337
	WP_012849558.1	cas3_TypeI	CAS-TypeI	CAS-TypeI_putative	mandatory	7.3e-10	36	0.893855	0.671875	47	347
	WP_015683222.1	cas3_TypeI	CAS-TypeI	CAS-TypeI_putative	mandatory	0.00025	17.8	0.550279	0.309179	153	344
	WP_034167956.1	cas3_TypeI	CAS-TypeI	CAS-TypeI_putative	mandatory	1.5e-08	31.6	0.539106	0.158716	732	914
E. piscicida JF1305	WP_015462114.1	csm2_TypeIIIA	CAS-TypeIII	CAS-TypeIII_putative	mandatory	4.1e-05	21.9	0.864583	0.743119	7	87
	WP_012846910.1	cas3_TypeI	CAS-TypeIII	CAS-TypeIII_putative	forbidden	8.1e-10	35.8	0.541899	0.284271	391	587
	WP_012847284.1	cas3_TypeI	CAS-TypeIII	CAS-TypeIII_putative	forbidden	0.00026	17.7	0.550279	0.302839	153	344
	WP_012848226.1	cas3_TypeI	CAS-TypeIII	CAS-TypeIII_putative	forbidden	3.6e-13	46.8	0.575419	0.439825	137	337
	WP_012849558.1	cas3_TypeI	CAS-TypeIII	CAS-TypeIII_putative	forbidden	7.2e-10	36	0.893855	0.671875	47	347
	WP_034167956.1	cas3_TypeI	CAS-TypeIII	CAS-TypeIII_putative	forbidden	1.5e-08	31.6	0.539106	0.158716	732	914
	WP_012846910.1	cas3_TypeI	CAS-TypeI	CAS-TypeI_putative	mandatory	8.1e-10	35.8	0.541899	0.284271	391	587
	WP_012847284.1	cas3_TypeI	CAS-TypeI	CAS-TypeI_putative	mandatory	0.00026	17.7	0.550279	0.302839	153	344
	WP_012848226.1	cas3_TypeI	CAS-TypeI	CAS-TypeI_putative	mandatory	3.6e-13	46.8	0.575419	0.439825	137	337
	WP_012849558.1	cas3_TypeI	CAS-TypeI	CAS-TypeI_putative	mandatory	7.2e-10	36	0.893855	0.671875	47	347
	WP_034167956.1	cas3_TypeI	CAS-TypeI	CAS-TypeI_putative	mandatory	1.5e-08	31.6	0.539106	0.158716	732	914
E. piscicida S11-285	WP_015462114.1	csm2_TypeIIIA	CAS-TypeIII	CAS-TypeIII_putative	mandatory	4.3e-05	21.9	0.864583	0.743119	7	87
	WP_012846910.1	cas3_TypeI	CAS-TypeIII	CAS-TypeIII_putative	forbidden	8.4e-10	35.8	0.541899	0.284271	391	587
	WP_015461320.1	cas3_TypeI	CAS-TypeIII	CAS-TypeIII_putative	forbidden	3.6e-13	46.9	0.575419	0.439825	137	337
	WP_069578097.1	cas3_TypeI	CAS-TypeIII	CAS-TypeIII_putative	forbidden	0.00027	17.7	0.550279	0.30094	153	344
	WP_069578773.1	cas3_TypeI	CAS-TypeIII	CAS-TypeIII_putative	forbidden	1.6e-08	31.6	0.539106	0.158716	732	914
	WP_069579047.1	cas3_TypeI	CAS-TypeIII	CAS-TypeIII_putative	forbidden	7.6e-58	193.9	0.902235	0.393871	276	622
	WP_069579210.1	cas3_TypeI	CAS-TypeIII	CAS-TypeIII_putative	forbidden	5.9e-10	36.3	0.893855	0.671875	47	347
	WP_012846910.1	cas3_TypeI	CAS-TypeI	CAS-TypeI_putative	mandatory	8.4e-10	35.8	0.541899	0.284271	391	587
	WP_015461320.1	cas3_TypeI	CAS-TypeI	CAS-TypeI_putative	mandatory	3.6e-13	46.9	0.575419	0.439825	137	337
	WP_069578097.1	cas3_TypeI	CAS-TypeI	CAS-TypeI_putative	mandatory	0.00027	17.7	0.550279	0.30094	153	344
	WP_069578773.1	cas3_TypeI	CAS-TypeI	CAS-TypeI_putative	mandatory	1.6e-08	31.6	0.539106	0.158716	732	914
	WP_069579035.1	cas1_TypeIE	CAS-TypeI	CAS-TypeI_putative	mandatory	1e-97	324.1	0.992565	0.917808	14	281
	WP_069579038.1	cas5_TypeIE	CAS-TypeI	CAS-TypeI_putative	mandatory	2.6e-54	181.9	0.991304	0.966245	5	233
	WP_069579040.1	cas7_TypeIE	CAS-TypeI	CAS-TypeI_putative	mandatory	8.7e-101	335.6	0.990769	0.878963	8	312
	WP_069579041.1	cas6_TypeIE	CAS-TypeI	CAS-TypeI_putative	mandatory	1.5e-45	153.6	0.995192	0.957346	3	204
	WP_069579044.1	cse2_TypeIE	CAS-TypeI	CAS-TypeI_putative	mandatory	6.8e-27	92.3	0.974843	0.856322	18	166
	WP_069579046.1	cse1_TypeIE	CAS-TypeI	CAS-TypeI_putative	mandatory	1.7e-61	206.2	0.968254	0.965587	6	482
	WP_069579047.1	cas3_TypeI	CAS-TypeI	CAS-TypeI_putative	mandatory	7.6e-58	193.9	0.902235	0.393871	276	622
	WP_069579210.1	cas3_TypeI	CAS-TypeI	CAS-TypeI_putative	mandatory	5.9e-10	36.3	0.893855	0.671875	47	347
	WP_071890331.1	cas2_TypeIE	CAS-TypeI	CAS-TypeI_putative	mandatory	5e-28	94.7	1	0.915789	1	87
